# Simulation of undiagnosed patients with novel genetic conditions

Emily Alsentzer<sup>1,2,\*</sup>, Samuel G. Finlayson<sup>1,2,4,5,\*</sup>, Michelle M. Li<sup>1,3</sup>, Undiagnosed Diseases Network, Shilpa N. Kobren<sup>1,‡</sup>, and Isaac S. Kohane<sup>1,‡</sup>

<sup>1</sup>Department of Biomedical Informatics, Harvard Medical School, Boston, MA 02115, USA

<sup>2</sup>Program in Health Sciences and Technology, MIT, Cambridge, MA 02139, USA

<sup>3</sup>Bioinformatics and Integrative Genomics, Harvard Medical School, Boston, MA 02115, USA

<sup>4</sup>Department of Pediatrics, Division of Genetic Medicine, Seattle Children's Hospital, Seattle, WA 98105, USA

<sup>5</sup>Division of Medical Genetics, Department of Medicine, University of Washington, Seattle, WA 98105, USA

‡Corresponding authors. Email: {Shilpa\_Kobren, Isaac\_Kohane}@hms.harvard.edu

\*Denotes equal contribution

1 **Rare Mendelian disorders pose a major diagnostic challenge and collectively affect 300-400**  
2 **million patients worldwide. Many automated tools aim to uncover causal genes in patients**  
3 **with suspected genetic disorders, but evaluation of these tools is limited due to the lack of**  
4 **comprehensive benchmark datasets that include previously unpublished conditions. In this**  
5 **chapter, we present a computational pipeline that simulates realistic clinical datasets to ad-**  
6 **dress this deficit. Our framework jointly simulates complex phenotypes and challenging**  
7 **candidate genes and produces patients with novel genetic conditions. We demonstrate the**  
8 **similarity of our simulated patients to real patients from the Undiagnosed Diseases Network**  
9 **and evaluate common gene prioritization methods on the simulated cohort. These priori-**  
10 **zation methods recover known gene-disease associations but perform poorly on diagnosing**  
11 **patients with novel genetic disorders. Our publicly-available dataset and codebase can be**  
12 **utilized by medical genetics researchers to evaluate, compare, and improve tools that aid in**  
13 **the diagnostic process.**

## 14 Introduction

15 Rare congenital disorders are estimated to affect nearly 1 in 17 people worldwide [1], yet the  
16 genetic underpinnings of these conditions—knowledge of which could improve support and treat-  
17 ment for scores of patients—remain elusive for 70% of individuals seeking a diagnosis and for  
18 half of suspected Mendelian conditions in general [2,3]. This diagnostic deficit results in a sub-  
19 stantial cumulative loss of quality-adjusted life years and a disproportionate burden on healthcare  
20 systems overall [4–6]. Organizations such as the Undiagnosed Disease Network (UDN) in the  
21 United States have been established to facilitate the diagnosis of such patients, which has resulted  
22 in both successful diagnoses for many patients as well as the discovery of new diseases [7,8].

23 The diagnostic workup of patients with suspected Mendelian disorders increasingly includes  
24 genomic sequencing. Whole genome or exome sequencing typically identifies thousands of genetic  
25 variants which must be analyzed to identify the subset of causal variant(s) yielding the patient’s  
26 syndrome (Figure 1a). This process is challenging and error prone; for example, patients may  
27 have variants that do not ultimately cause their presenting syndrome, yet fall into genes that are  
28 plausibly associated with one or more of their phenotypes. Further challenges arise in situations  
29 where patients present with a novel set of symptoms that do not match any known disorder, or  
30 when their disease-causing variants occur in genes not previously associated with any disease  
31 (Figure 1b). In the first phase of the UDN for instance, 23% of eventual patient diagnoses were  
32 due to novel syndromes [4].

33 To accelerate the diagnostic process, a plethora of computational tools are used by clinical  
34 teams to automatically analyze patients’ genetic and phenotypic data to prioritize causal vari-  
35 ants [9–12]. Unfortunately, a comprehensive evaluation of these tools’ performance is hindered  
36 by the lack of a public benchmark database of rare disease patients of sufficient size to cover the  
37 full breadth of genomic diseases. While efforts such as the Deciphering Developmental Disorders  
38 project provide useful benchmarks for specific populations of rare disease patients, they are lim-  
39 ited in diagnostic scope and require an extensive DUA for full access [13]. In lieu of real patient  
40 data, simulated patient data offers several clear advantages: the simulation approach can be scaled  
41 to an arbitrary number of patients and disorders, data are inherently private, and the transparency  
42 of the simulation process can be leveraged to expose specific failure modes of different methods.  
43 However, simulated patient data is only useful insofar as it reflects the challenges of real-world  
44 diagnosis. This requires a faithful simulation of the complex relationship between candidate genes  
45 and the patient’s phenotypes as well as the notion of disease novelty, as described above. Existing

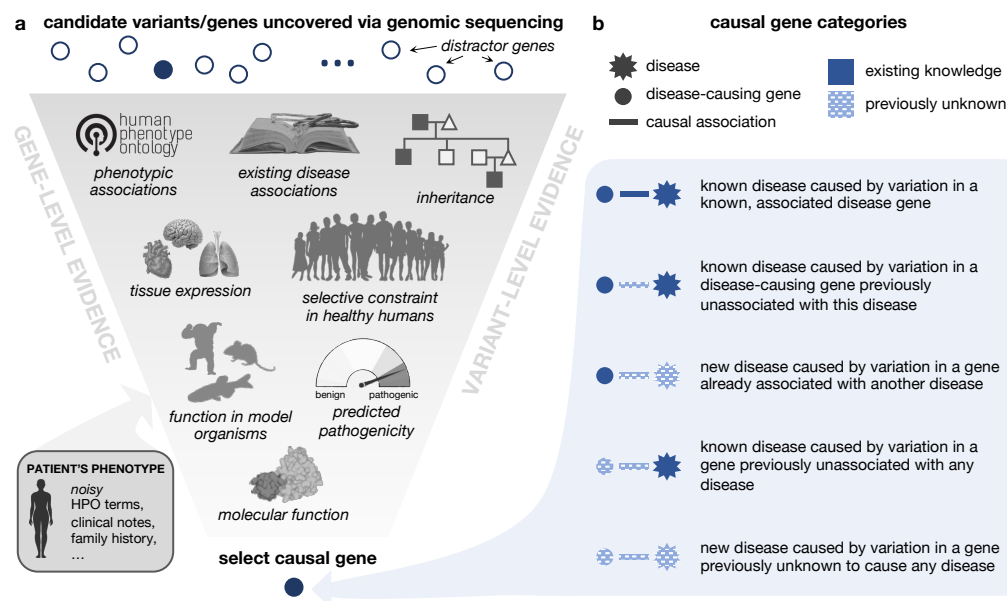

**Figure 1: Identification and categorization of causal disease genes.** **a.** Genomic variation uncovered in an affected patient through DNA sequencing is investigated using variant-level and gene-level evidence in order to identify the impacted gene that is most likely responsible for causing the patient’s symptoms. Here we depict a subset of relevant information that a care team may use to make this assessment. **b.** The causal gene responsible for a patient’s disorder can be categorized based on the extent of medical knowledge that exists about the gene and its associated disorder. Intuitively, diagnosing patients where less is known about their causal gene and disease (bottom category) is a more challenging task than diagnosing patients where more is known about causal gene and disease (top category).

46 approaches for simulating rare disease patients unrealistically model the patient’s genotype and  
 47 phenotype disjointly by inserting disease-causing alleles into otherwise healthy exomes and sepa-  
 48 rately simulating patient phenotypes as a set of precise, imprecise, and noisy phenotypes [14–16].  
 49 Although healthy individuals may randomly harbor variants in disease-causing genes, these genes  
 50 would be weak candidates as the patients’ symptoms would not cause a physician to hone in on  
 51 those genomic regions. In addition, with few exceptions, most studies analyzing tools for rare dis-  
 52 ease diagnosis do not assess the ability of tools to identify novel syndromes or variants [15, 17, 18].  
 53 Given the importance and prevalence of automated prioritization tools in the diagnostic process,  
 54 enabling meaningful comparisons and improvement of these tools via benchmarks that capture the  
 55 notion of novelty and realistic phenotypes will be essential.

56 Here, we present a computational pipeline to simulate undiagnosed patients that can be used  
 57 to evaluate gene prioritization tools. Each simulated patient is represented by sets of candidate  
 58 disease-causing genes and standardized phenotype terms. To model novel genetic conditions  
 59 in our simulated patients, we first curate a knowledge graph (KG) of known gene–disease and  
 60 gene–phenotype annotations that is time-stamped to 2015. This enables us to define post-2015

61 medical genetics discoveries as novel with respect to our KG. We additionally provide a taxonomy  
62 of categories of “distractor” genes that do not cause the patient’s presenting syndrome yet would  
63 be considered plausible candidates during the clinical process. We then introduce a simulation  
64 framework that jointly samples genes and phenotypes according to these categories to simulate  
65 nontrivial and realistic patients and show that our simulated patients closely resemble real-world  
66 patients profiled in the UDN. Finally, we reimplement existing gene prioritization algorithms and  
67 assess their performance in identifying etiological genes in our simulated patient set, revealing  
68 specific settings in which established tools excel or fall short. Overall, the approach to patient  
69 simulation we present here is, to the best of our knowledge, the first to incorporate realistic, non-  
70 trivial candidate distractor genes and phenotype annotations as well as the notion of novel genetic  
71 disorders. We provide our framework and simulated patients as a public resource to advance the  
72 development of new and improved tools for medical genetics.

## 73 Results

74 We design and implement a pipeline for simulating patients with difficult-to-diagnose Mendelian  
75 disorders (Figure 2a). Each simulated patient is represented by an age range, a set of positive  
76 symptoms (phenotypes) that they exhibit, a set of negative phenotypes that they do not exhibit,  
77 and a set of candidate genes that may be causing their disease. There are three components of  
78 our simulation framework. First, each patient is initialized with a genetic disorder profiled in the  
79 comprehensive and well-maintained rare genetic disease database Orphanet [19]. Second, the im-  
80 precision in real-world diagnostic evaluations is modeled via *phenotype dropout* to mimic patients’  
81 partially observed symptoms, *phenotype corruption* which replaces specific symptoms with more  
82 general phenotype terms, and *phenotype noise* which adds unrelated symptoms and comorbidi-  
83 ties proportionally to their prevalence in age-matched patients from a medical insurance claims  
84 database. Finally, we develop a framework to generate strong, yet ultimately noncausal, candidate  
85 genes inspired by the typical rare disease diagnostic process (Figure 2b). These challenging dis-  
86 tractor genes and some associated phenotype terms are added according to each of six distractor  
87 gene modules (See Methods for further details).

88 **Simulated patients mimic real-world patients.** We leverage our computational pipeline to simu-  
89 late 42,680 realistic rare disease patients representing a total of 2,134 unique Mendelian disorders  
90 and 2,401 unique causal genes. Each simulated patient is characterized by 18.39 positive phe-  
91 notypes ( $sd = 7.7$ ), 13.5 negative phenotypes ( $sd = 8.5$ ), and 14 candidate genes ( $sd = 3.5$ ) on

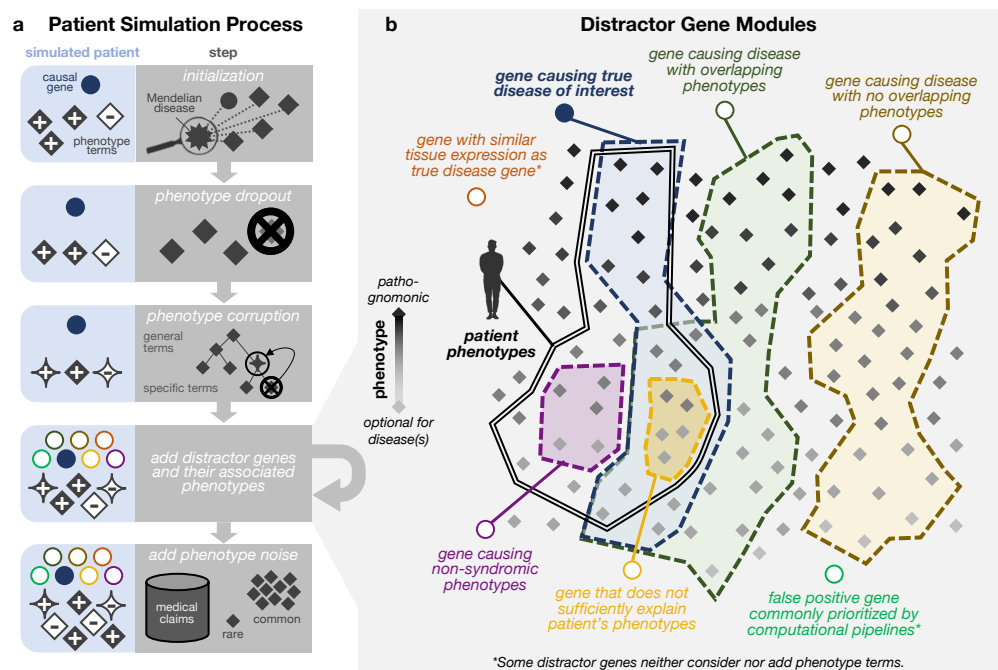

**Figure 2: Simulation process generates patients with multiple phenotype terms and candidate genes. a.** Patients are first assigned a true disease and initialized with a gene known to cause that disease (blue circle) as well as with positive and negative phenotypes associated with that disease (gray diamonds). Phenotype terms are then randomly removed through phenotype dropout, randomly altered to be less specific according to their position in an ontology relating phenotype terms, and augmented with terms randomly selected by prevalence in a medical claims database. Finally, strong distractor candidate genes and relevant additional phenotypes are generated based on six distractor gene modules. **b.** The six distractor gene modules are inspired by genes that are frequently considered in current clinical genomic workflows and are designed to generate highly plausible, yet ultimately non-causal, genes for each patient. Four of the distractor gene modules are defined by the overlap—or lack thereof—between the phenotypes associated with the distractor gene and the phenotypes associated with the patient’s causal gene. The remaining two modules are defined by their similar tissue expression as the true disease gene or solely by their frequent erroneous prioritization in computational pipelines.

92 average.

93 To assess whether our simulated patients are systematically distinguishable from real-world  
 94 patients, we assemble a cohort of 121 real-world patients from the Undiagnosed Diseases Network  
 95 (UDN) who were diagnosed with a disease in Orphanet annotated with genes and phenotypes and  
 96 then select 2,420 simulated patients with matching diseases. There are 92 unique diseases repre-  
 97 sented in the real and disease-matched simulated patient cohorts. Real and simulated patients have  
 98 similar numbers of candidate genes (13.13 vs 13.94 on average; Figure 3a) and positive phenotype  
 99 terms (24.08 vs 21.57 on average; Figure 3b). Real-world patients are also more similar to their  
 100 simulated counterparts than to other real-world patients. When we apply dimensionality reduction  
 101 on the positive phenotype terms of patients, real-world patients cluster with and are visually in-  
 102 distinguishable from simulated patients within each disease category (Figure 3c), suggesting that

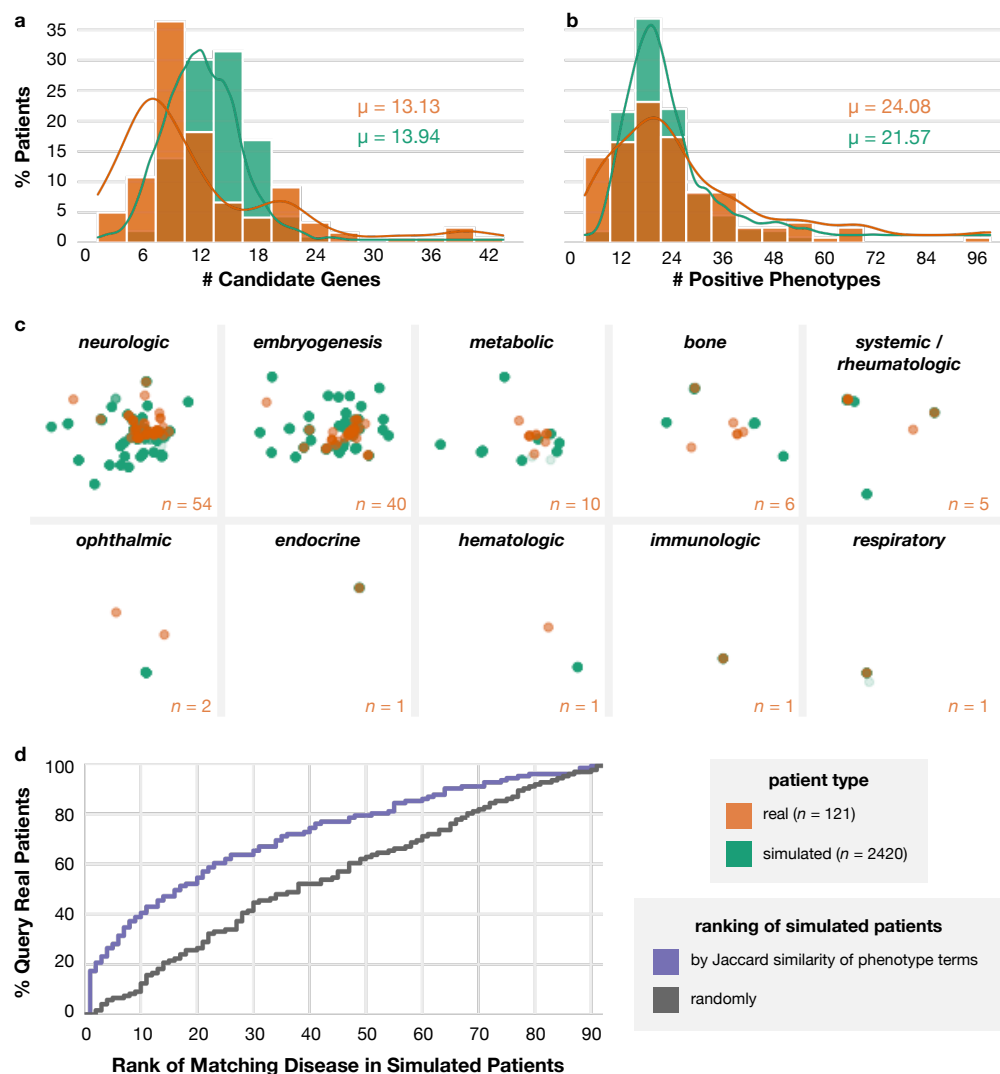

**Figure 3: Simulated patients mimic real-world patients.** Diagnosed, real-world patients from the Undiagnosed Diseases Network (orange) and a disease-matched cohort of simulated patients (teal) have similar numbers of **a** candidate genes per patient (average of 13.13 vs. 13.94) and **b** positive phenotype terms per patient (average of 24.08 vs. 21.57). **c**. Real patients (orange) and simulated patients (teal) are indistinguishable based on their annotated positive phenotype terms within each Orphanet disease category, as visualized using non-linear dimension reduction via a Uniform Manifold Approximation and Projection (UMAP) plot. The horizontal and vertical axes are uniform across all plots. The number of real patients within each disease category is listed in the corner of each plot; there are 20 simulated patients for each real patient. **d**. For each real-world patient, all simulated patients in the disease-matched cohort are ranked randomly (black) and by the Jaccard similarity of their phenotype terms to the query real-world patient (purple). The Cumulative Distribution Function (ECDF) plot shows that the basic Jaccard similarity metric is able to retrieve simulated patients with the same disease as the query real patient more accurately than if the simulated patients were retrieved randomly.

103 there are not consistent differences in phenotype term usage between real and simulated patients.  
 104 Moreover, for each real-world patient, the ten phenotypically-closest simulated patients with the  
 105 same disease are closer than the ten phenotypically-closest real-world patients with different dis-

106 eases (average Jaccard Similarity of 0.952 vs 0.930; p-value=7.4e-81, Wilcoxon one-sided test).  
107 We also employ a nearest neighbor analysis using Jaccard Similarity as our distance metric to eval-  
108 uate whether the simulated patients' phenotype terms are sufficiently reflective of and specific to  
109 their assigned diseases. We find that simulated patients with similar sets of phenotype terms to  
110 real patients are more likely to have the same disease as those real patients than randomly selected  
111 simulated patients (Figure 3d).

112 **Pipeline simulates patients with novel and diverse genetic conditions.** A primary challenge  
113 in diagnosing real-world patients, and one that should be reflected in relevant simulated patients,  
114 is when their causal gene-disease relationships have never previously been documented (Figure  
115 1b). However, simulating patients with “novel” genetic conditions is conceptually nontrivial, as  
116 simulated disease associations must be drawn from some existing knowledge graph. To overcome  
117 this issue, we consider the gene-phenotype-disease associations annotated in a knowledge graph  
118 timestamped to 2015 to be “existing knowledge” and discoveries made post-2015 to be “novel”  
119 (see Section 6). This enables us to categorize simulated patients according to the novelty of their  
120 gene-disease relationships with respect to this timestamped knowledge graph (Table 1). Although  
121 only 2% and 1% of the total simulated patients respectively correspond to previously known and  
122 previously unknown diseases caused by genes never before associated with any disease, the total  
123 number of simulated patients in these two categories are 14x and 190x higher respectively than  
124 in our real-world dataset. Moreover, whereas only 231 unique disease genes have been identified  
125 as causal in our phenotypically-diverse, real-world UDN dataset, our simulated patients' 2,100+  
126 unique diseases are caused by 2,401 unique disease genes. Overall, these results demonstrate that  
127 our pipeline can simulate substantially higher numbers of patients—that are diverse with respect  
128 to disease and the degree of novelty of their causal gene-disease relationships—than compared to  
129 a national dataset of real-world patient data.

130 **Performance of gene prioritization algorithms on real and simulated patients.** The size and di-  
131 versity of our real and simulated patient datasets enable us to evaluate how well existing algorithms  
132 are able to prioritize causal genes in patients with different degrees of preexisting knowledge of  
133 their gene-disease relationships. We run four commonly-used gene prioritization algorithms on  
134 patients in each of the causal gene-disease association categories outlined in Figure 1b, ensuring  
135 that each algorithm only had access to the existing knowledge found in the timestamped 2015  
136 knowledge graph. Each algorithm inputs the patient's positive phenotype terms and the patient's  
137 individualized set of candidate genes and produces a ranking of the candidate genes according to

| Causal Gene Category                                                                      | # Simulated Patients | # Real-world UDN Patients |
|-------------------------------------------------------------------------------------------|----------------------|---------------------------|
| Known disease caused by an associated causal gene                                         | 36,226 (85%)         | 149 (58%)                 |
| Known disease caused by a disease-causing gene previously unassociated with their disease | 4,339 (10%)          | 15 (6%)                   |
| Known disease caused by a gene never before associated with any disease                   | 835 (2%)             | 5 (2%)                    |
| Novel disease caused by a disease-causing gene                                            | 947 (2%)             | 60 (23%)                  |
| Novel disease caused by a gene never before associated with any disease                   | 333 (1%)             | 29 (11%)                  |

**Table 1:** Counts of simulated and real-world UDN patients in each causal gene–disease category. UDN patients with multiple causal genes may appear in several categories.

138 how likely they are to cause the patient’s phenotypes. Briefly, Phrank uses semantic similarity of  
139 phenotype terms in the Human Phenotype Ontology (HPO) and prevalence of gene associations  
140 across these phenotypes to match patient symptoms to genes or diseases [10]. The Patient–Gene  
141 version of Phrank directly compares a patient’s phenotype terms and the phenotype terms associ-  
142 ated with the candidate gene. The Patient-Disease version considers all diseases associated with a  
143 candidate gene and compares the patients’ phenotypes and those diseases’ phenotypes, assigning  
144 the candidate gene the highest similarity score across all of its associated diseases. Phenomizer  
145 uses semantic similarity of phenotype terms and prevalence of phenotype associations across all  
146 known diseases to match patient symptoms to diseases [12]. Candidate genes are assigned the  
147 highest score across their associated diseases. Phenolyzer uses semantic similarity to match patient  
148 symptoms to diseases and scores genes directly associated with the diseases as well as additional  
149 genes connected via a gene-gene network [11].

150 **Real-world and simulated patients are equally difficult to diagnose.** We first assess whether  
151 gene prioritization performance was similar between the simulated patient cohort and the real-  
152 world patient cohort. Across both patient sets, correctly ranking the causal gene becomes more  
153 difficult as the amount of information about the causal gene-disease relationship in the knowl-  
154 edge graph decreases (Figure 4). We find that the performance between simulated and real-world  
155 patients was similar for all four algorithms across all but the easiest gene-disease association cat-



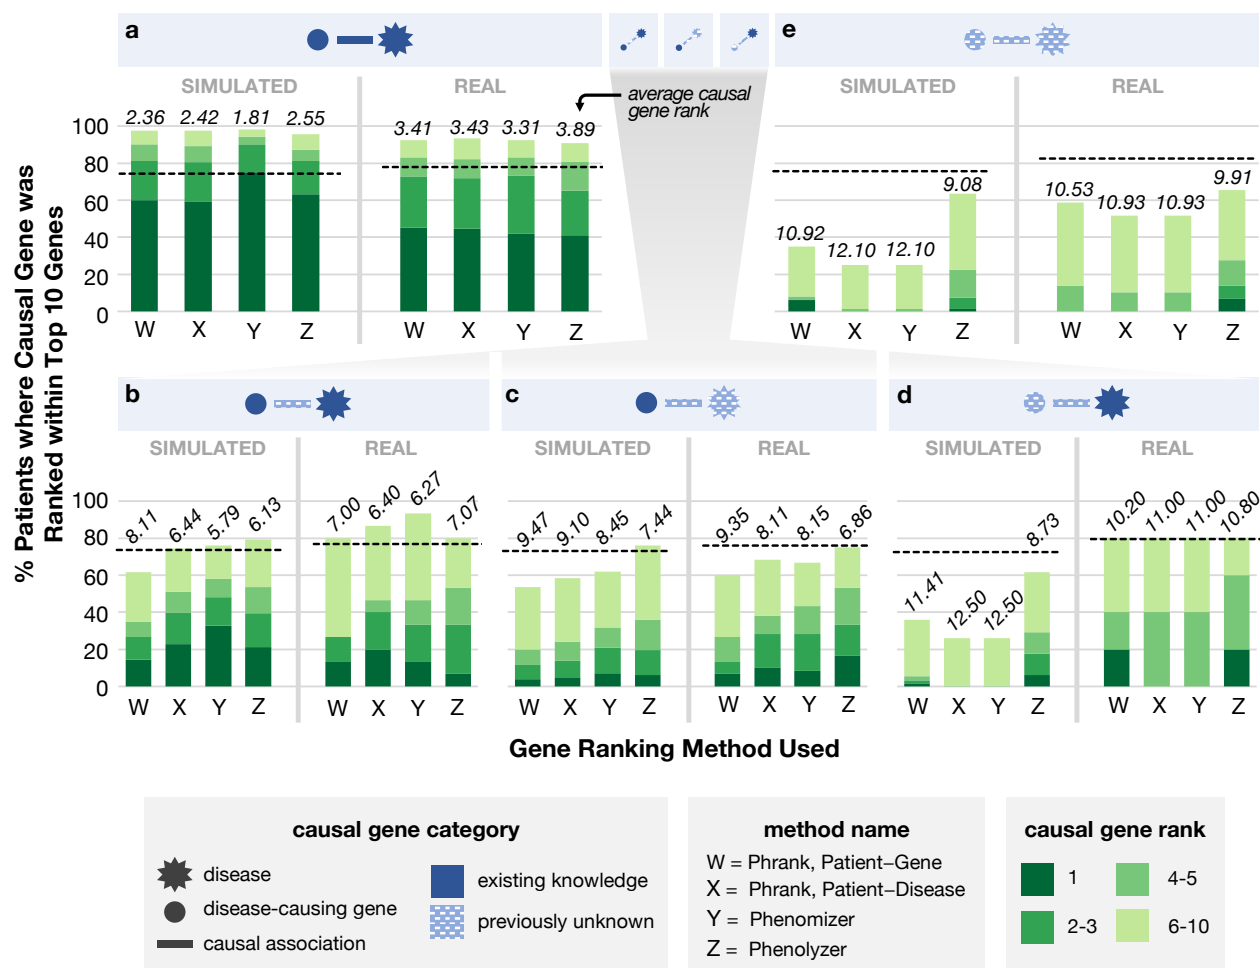

**Figure 4: Ability of computational approaches to rank causal genes differs across disease-gene categories.** We group simulated patients and real-world UDN patients into five categories based on their type of causal gene-disease association (patient counts in Table 1). These categories, described in detail in Figure 1b, are illustrated in the blue header bars above each plot and ordered decreasingly from left to right by the amount of existing knowledge of the association in the underlying knowledge graph. We run four gene ranking methods on the positive phenotype terms and the candidate gene list for each simulated and real-world patient within each causal gene-disease category, and we show here the ability of these methods to correctly rank each patient's causal gene within the top 10 ranked genes. The average rank of the causal gene is italicized above each bar. Dashed lines denote the average percent of patients where the causal gene appeared in the top 10 across ten random rankings of the candidate genes.

156 egories. Overall, these results indicate that the simulated patient cohort can serve as a reasonable  
 157 proxy for real-world patients, particularly when evaluating a method's ability to perform well de-  
 158 spite reduced existing knowledge about the causal gene and disease.

159 **Novel syndromes and disease genes represent greatest challenge.** All four gene prioritization  
 160 tools perform well when the patient's causal gene-disease relationship is in the knowledge graph  
 161 (Figure 4a). Specifically, all methods rank the causal gene in the top 3 in approximately 75%  
 162 of simulated and real-world patients, with the causal gene ranked first in over 60% of simulated

163 and over 40% of real-world patients by all methods. However, all methods perform incrementally  
164 worse as less information about the simulated patient's causal gene-disease relationship is present  
165 in the knowledge graph. In patients with a known disease caused by a gene previously unassociated  
166 with that disease (Figure 4b), the average rank of the causal gene is 5.79 at best. When the patient  
167 has a novel disease, even when the causal gene has some other existing disease associations (Figure  
168 4c), performance further declines; the average rank of the causal gene is only 6.86 for the highest  
169 performing method. The most difficult scenarios occur when the patient's causal gene has never  
170 been associated with any disease. When the patient's disease is known (Figure 4d), the average  
171 rank of the causal gene is 8.73 for the highest performing method, and when both the disease and  
172 causal gene are unknown (Figure 4e), the average rank is 9.08 at best.

173 Phrank and Phenomizer, which both exclusively use phenotype-phenotype, phenotype-gene  
174 and phenotype-disease annotations, excel in settings where the patient's causal gene and disease  
175 are in the knowledge graph (Figure 4a,b). Phenolyzer, which leverages gene-gene associations in  
176 addition, outperforms the other two algorithms when either the causal gene or disease are unknown  
177 (Figure 4c,d). Indeed, when both the causal gene and disease are unknown (Figure 4e), Phenolyzer  
178 ranks the causal gene 9.08 for simulated patients on average whereas both versions of Phrank  
179 and Phenomizer rank the causal gene significantly lower, at 10.92, 12.10, and 12.10 respectively  
180 on average (all  $P$  values  $< 2.89 * 10^{-17}$ ). This suggests that the consideration of gene-gene  
181 associations may help gene prioritization algorithms generalize to settings where the causal gene  
182 has not been previously associated with a disease. When algorithms are evaluated on all patients  
183 together rather than separately by novelty category, the general performance decline for all methods  
184 across categories as well as relative differences in performance within each novelty category are  
185 obfuscated (Supplemental Figure 1).

186 **Simulation pipeline components are key to simulating realistic, challenging patients.** To deter-  
187 mine the importance of each component in our simulation pipeline (Figure 2), we run our pipeline  
188 using only subsets of these components and then evaluate how well Phrank, the fastest of the three  
189 gene prioritization algorithms we evaluated, is able to rank causal genes in the resultant simulated  
190 patients. In all ablations, we set the probability of sampling each candidate gene module to be  
191 uniform. As expected, we find that the gene prioritization task is easiest when all of the phenotype-  
192 altering components and distractor gene modules (as illustrated in Figure 2) are excluded from our  
193 simulation pipeline, that is, when candidate genes are selected randomly and phenotype terms do  
194 not undergo corruption, dropout, or augmentation with phenotypic noise (Figure 5a). In this set-

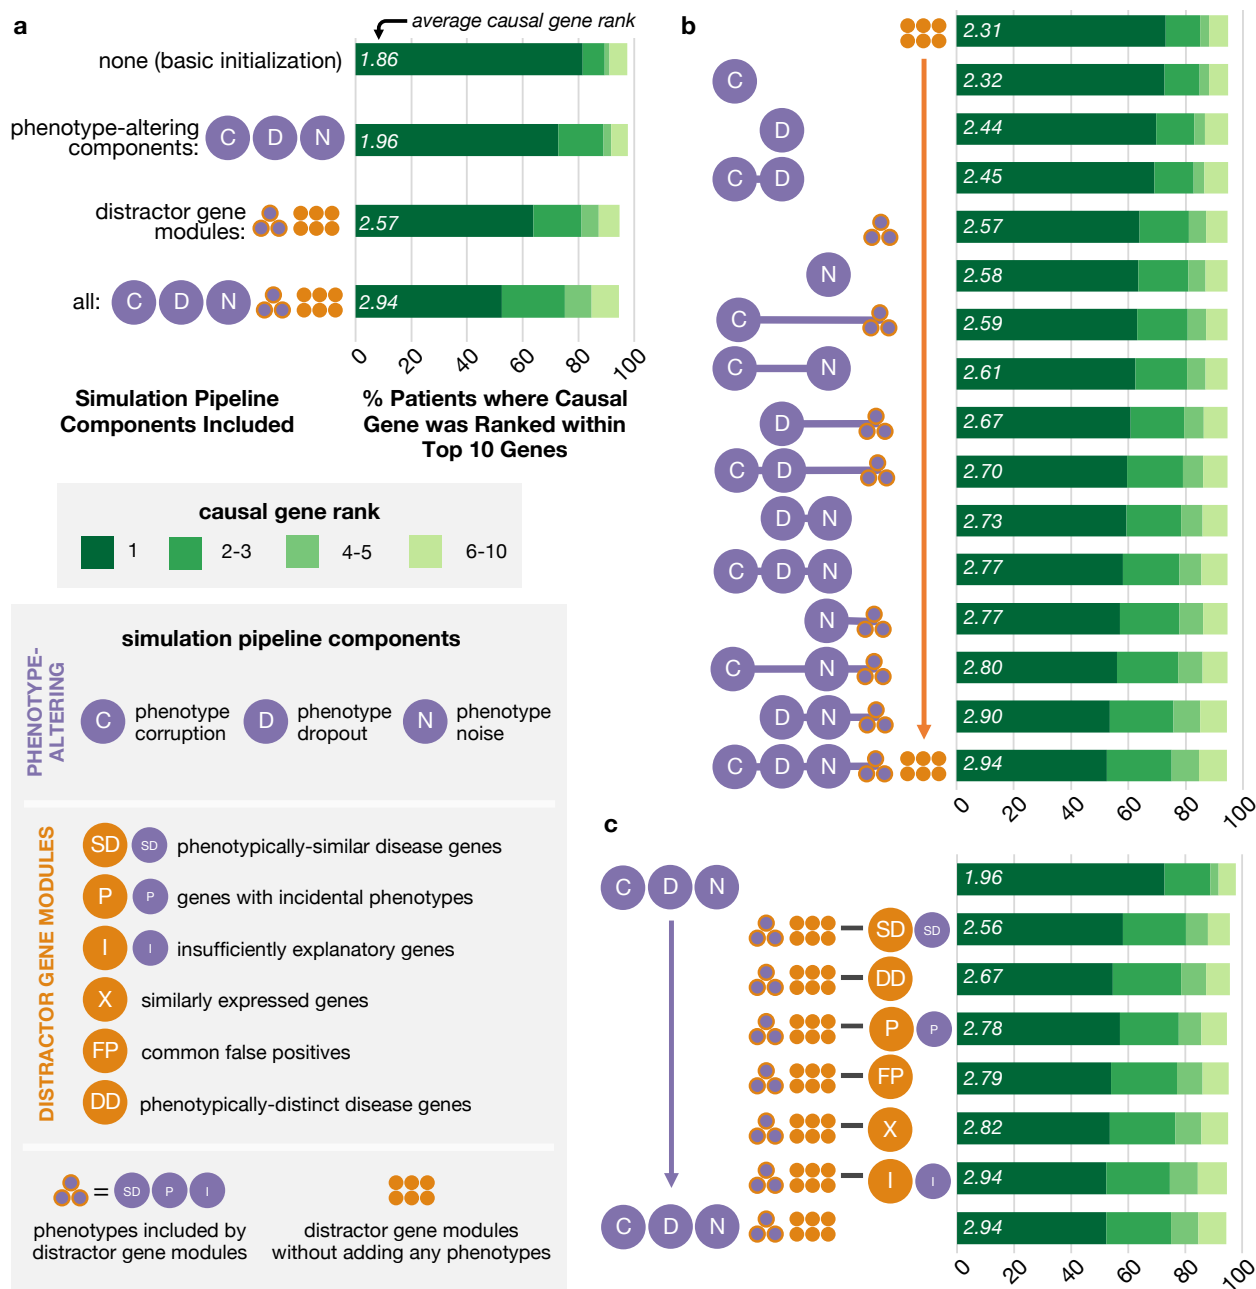

**Figure 5: Pipeline components increase the difficulty of causal gene identification in simulated patients.** We run a gene prioritization algorithm on patients simulated by our pipeline when varying subsets of pipeline components are included. We report the fraction of simulated patients where the causal gene was prioritized within the top 10 ranked genes (horizontal axis for all plots) when different components of the simulation pipeline are included (vertical axis for all plots). The average rank of the causal gene is listed in italics at the base of each bar. We show gene prioritization performance on simulated patients produced when the following components are included in the simulation pipeline: **a.** no phenotype- nor gene-based components (i.e., candidate genes sampled randomly and phenotype terms unaltered from initialization), all standalone phenotype-altering components alone, all distractor gene modules alone, or all pipeline components together; **b.** a “gene-only” version of distractor gene modules and each possible combination of subsets of phenotype-altering components; **c.** all three standalone phenotype-altering components and all but one distractor gene module at a time. Note that in b, horizontal lines in the vertical axis labels are for visual clarity, whereas in c, horizontal lines in the vertical axis signify set difference.

195 ting, the diagnostic gene appears at rank 1.855 on average. The task becomes significantly more  
196 difficult when only phenotype-altering components are added (average causal gene rank drops to  
197 1.955;  $P$  value  $< 0.001$ ) and even more difficult when only distractor gene modules are added (av-  
198 erage causal gene rank of 2.570;  $P$  value  $< 0.001$ ). The task is most difficult when the complete  
199 pipeline is used (average causal gene rank of 2.936;  $P$  value  $< 0.001$ ), suggesting that both the  
200 phenotype- and gene-based components of our simulation pipeline contribute to the generation of  
201 realistic, challenging rare disease patients.

202 We next measure how each phenotype-altering component—phenotype corruption, dropout,  
203 noise, and phenotypes added by the distractor gene modules—impacts the difficulty of the gene  
204 prioritization task (Figure 5b). To this end, we include a “gene-only” version of all distractor  
205 gene modules in the simulation pipeline, and we vary whether the distractor gene modules add  
206 associated phenotypes and whether phenotype terms undergo corruption, dropout, or noise aug-  
207 mentation. When we restrict to using only one phenotype-altering component at a time, we find  
208 that the component that increases the difficulty of the gene prioritization task the most is pheno-  
209 type noise (average causal gene rank 2.583), followed by phenotypes added by distractor gene  
210 modules, phenotype dropout, and phenotype corruption (average causal gene ranks 2.570, 2.435,  
211 and 2.316 respectively). Including either the distractor gene-associated phenotypes or phenotype  
212 noise alone increases the difficulty of the gene prioritization task more than including both phe-  
213 notype dropout and corruption together (average causal gene rank 2.448). However, we confirm  
214 that including these latter two phenotype-altering components in addition to either one or both of  
215 the distractor gene phenotypes and phenotype noise does in fact increase the difficulty of the task  
216 more than if they were excluded. In general, adding additional phenotype-altering components  
217 makes the gene prioritization task progressively more difficult, and as expected, the most difficult  
218 combination is when all phenotype components are included. As before, we find that when the  
219 two strongest phenotype-altering components (noisy and distractor gene-associated phenotypes)  
220 are applied together, the gene prioritization task is more difficult than when certain sets of three  
221 phenotype-altering components are used (average causal gene rank of 2.773 versus average causal  
222 gene ranks of 2.767 and 2.702).

223 Finally, we perform an ablation of each of the six distractor gene modules by removing a  
224 single module at a time (Figure 5c). When each distractor gene module is removed, the number  
225 of genes that would have been sampled from that module are instead sampled randomly to en-  
226 sure that the total number of candidate genes for each patient is constant. Removing the module

227 that generates phenotypically-similar disease genes or the module that generates phenotypically-  
228 distinct disease genes make the gene prioritization task substantially easier for Phrank relative to  
229 the individual exclusion of other distractor gene modules (average causal gene rank of 2.564 and  
230 2.666 respectively). This is intuitive because Phrank’s gene prioritization approach is based on  
231 disease–phenotype and gene–phenotype associations. We suspect that the other modules in our  
232 pipeline may generate distractor genes that are more challenging for gene prioritization algorithms  
233 that explicitly leverage cohort-based mutational recurrence, gene expression, and other additional  
234 data. Nevertheless, we confirm that removal of every gene module except for the insufficiently  
235 explanatory gene module makes the gene prioritization task easier. There are fewer insufficiently  
236 explanatory candidate genes in the ablation patient cohort (Supplemental Figure 2), which may  
237 explain why their removal does not change gene prioritization performance. Furthermore, removal  
238 of all distractor gene modules together makes the task much easier compared to the removal of  
239 any individual module, demonstrating that no one module is solely responsible for generating the  
240 distractor genes that increase the difficulty of causal gene prioritization in simulated rare disease  
241 patients.

## 242 Discussion

243 In this work, we developed a flexible framework for simulating difficult-to-diagnose patients with  
244 genetic disorders like those profiled in the Undiagnosed Diseases Network (UDN). Key features  
245 of our framework include: (i) jointly modeling patients’ genotype and phenotype, (ii) capturing  
246 imprecision in real-world clinical workups by corrupting, excluding, and adding noise to patients’  
247 recorded symptoms, and (iii) simulating patients with novel causal gene–disease associations rela-  
248 tive to an established knowledge graph, to emulate the challenging task of diagnosing a previously  
249 unpublished disorder. Our framework can generate a phenotypically diverse cohort that is repre-  
250 sentative of all rare diseases characterized in Orphanet, and these simulated patients can be freely  
251 shared without privacy concerns.

252 Our simulated patients are represented as sets of phenotypes and candidate genes, rather  
253 than candidate variants. Variant-level properties, such as variant inheritance patterns, functional  
254 impacts, and cohort-based frequencies, are considered only indirectly, as we assume that a patient’s  
255 candidate genes have been clinically shortlisted because compelling variants have implicated or lie  
256 within them [9, 20]. Some variants, such as regulatory variants or larger indels, may impact multi-  
257 ple genes simultaneously. In addition, real-world patients may have two or more genes contributing

258 to their presenting disorder(s). Although our current framework generates patients with mono-  
259 genic conditions, it could be extended to simulate patients with more than one causal gene; this  
260 will become more feasible at scale as the number of rare, multigenic diseases curated in Orphanet  
261 increases. As the biomedical data leveraged by prioritization methods diversifies, our framework  
262 could be extended to reflect these additions, for instance, by incorporating distractor genes that  
263 are highly constrained across human populations and/or phenotypic noise inspired by errors in  
264 machine learning-based parsing of clinical notes. Similarly, by building upon the published lit-  
265 erature, our work is subject to biases inherent in the field of clinical genetics research writ large,  
266 including the historical overrepresentation of individuals of European descent and the diseases that  
267 affect them; indeed, we expect that the dataset and methods we present in this paper could be  
268 used to further interrogate these biases, for example by examining the differential performance of  
269 gene-prioritization tools on diseases that more often affect underrepresented populations.

270 Finding and annotating "novel" gene–disease associations—defined in our framework as  
271 those published post-2015—required significant manual review of public databases and literature.  
272 Databases that curate these associations (e.g., Orphanet, HPO) are often missing publication or  
273 discovery dates and are not updated in real time, and so an indeterminate lag exists between causal  
274 gene–disease associations being present in the literature and being reflected in these knowledge  
275 bases. To fairly evaluate gene prioritization methods across the disease novelty categories we de-  
276 scribe in Figure 1b, we ensured that all tested methods accessed solely our time stamped knowledge  
277 graph from 2015; only methods that used or could be reimplemented to exclusively use this form  
278 of input data were included. Indeed, due to their reliance on statically curated data, these meth-  
279 ods may have misprioritized real-world patients' gene–disease associations that were "known" by  
280 2015 but had yet to be incorporated into the knowledge graph, reflecting an expected and ongoing  
281 hindrance for diagnosing present-day patients (Figure 4a). We suspect that diagnostic tools that  
282 frequently mine the literature for new gene–phenotype–disease associations would excel at diag-  
283 nosing patients with known causal genes and known diseases relative to tools that rely on structured  
284 rare disease databases [21, 22].

285 We found that the algorithm that was most effective at finding novel disease-causing genes  
286 performed relatively poorly at diagnosing patients with known causal genes and diseases, under-  
287 scoring the importance of evaluating performance separately across distinct novelty categories.  
288 Given these findings, clinicians may opt to use certain computational tools earlier in the diagnostic  
289 process and move to research-oriented tools only in cases where a novel disease-causing gene is

290 suspected.

291 We expect that the simulated patients produced via our framework can be leveraged for a  
292 wide range of applications [23]. As we demonstrate here, the simulated patients can enable a uni-  
293 form evaluation of existing gene prioritization tools on a representative patient cohort. Developers  
294 can also internally validate and improve their tools by separately evaluating them on simulated  
295 patients across novelty categories and distractor gene categories. Another application area for our  
296 pipeline will be the generation of training data for machine learning algorithms. As the promise  
297 of machine learning solutions in the clinic grows, access to large-scale datasets of relevant clinical  
298 data will be essential [24]. We suspect that simulated patients such as those yielded by our method  
299 may provide invaluable training data for machine learning models for rare disease diagnosis, which  
300 would expose algorithms to data from diverse genetic disorders while reflecting realistic clinical  
301 processes.

302 **Data availability.** The simulated patient dataset as well as all intermediate data used in its cre-  
303 ation are shared with the research community via Harvard Dataverse at the DOI:  
304 <https://doi.org/10.7910/DVN/ANFOR3>. Anonymized UDN data has been deposited in dbGaP (ac-  
305 cession phs001232) and PhenomeCentral. Phenotypes and causal variants and genes related to  
306 UDN diagnoses are also shared publicly in ClinVar: [ncbi.nlm.nih.gov/clinvar/submitters/505999/](https://ncbi.nlm.nih.gov/clinvar/submitters/505999/).

307 **Code availability.** The code to reproduce results, together with documentation and examples of  
308 usage, can be found at <https://github.com/EmilyAlsentzer/rare-disease-simulation>.

309 **Acknowledgements.** We would like to thank Peniel Argaw, Chuck McCallum, Amelia Tan, Yidi  
310 Huang, and Mark Keller for their help in manually annotating each disease and disease–gene as-  
311 sociation in Orphanet according to the date of the Pubmed article that reported the discovery. We  
312 would also like to thank Cecilia Esteves for her help in understanding the Undiagnosed Diseases  
313 Network workflows.

314 E.A. is supported by a Microsoft Research PhD Fellowship. S.F. is supported by award  
315 Number T32GM007753 from the National Institute of General Medical Sciences. M.L. is sup-  
316 ported by T32HG002295 from the National Human Genome Research Institute and a National  
317 Science Foundation Graduate Research Fellowship.

318 UDN research reported in this manuscript was supported by the NIH Common Fund, through  
319 the Office of Strategic Coordination/Office of the NIH Director under Award Number(s)  
320 U01HG007709, U01HG010219, U01HG010230, U01HG010217, U01HG010233, U01HG010215,  
321 U01HG007672, U01HG007690, U01HG007708, U01HG007703, U01HG007674, U01HG007530,  
322 U01HG007942, U01HG007943, U01TR001395, U01TR002471, U54NS108251, and U54NS093793.  
323 The content is solely the responsibility of the authors and does not necessarily represent the official  
324 views of the National Institutes of Health.

325 **Authors contribution.** E.A., S.F, S.K., and I.K. designed the study. E.A. and S.F. implemented  
326 the simulation pipeline and gene prioritization algorithms, and E.A. conducted the validation of  
327 simulated patients and ablation analysis. M.L. assisted with the UMAP analysis. E.A., S.F., and  
328 S.K. wrote the manuscript.

329 **Competing interests.** The authors declare no competing interests.



330 **Undiagnosed Diseases Network Consortium.** Undiagnosed Diseases Network: Maria T. Acosta,  
331 Margaret Adam, David R. Adams, Justin Alvey, Laura Amendola, Ashley Andrews, Euan A. Ash-  
332 ley, Mahshid S. Azamian, Carlos A. Bacino, Guney Bademci, Ashok Balasubramanyam, Dustin  
333 Baldrige, Jim Bale, Michael Bamshad, Deborah Barbouth, Pinar Bayrak-Toydemir, Anita Beck,  
334 Alan H. Beggs, Edward Behrens, Gill Bejerano, Hugo J. Bellen, Jimmy Bennet, Beverly Berg-  
335 Rood, Jonathan A. Bernstein, Gerard T. Berry, Anna Bican, Stephanie Bivona, Elizabeth Blue,  
336 John Bohnsack, Devon Bonner, Lorenzo Botto, Brenna Boyd, Lauren C. Briere, Elly Brokamp,  
337 Gabrielle Brown, Elizabeth A. Burke, Lindsay C. Burrage, Manish J. Butte, Peter Byers, William  
338 E. Byrd, John Carey, Olveen Carrasquillo, Thomas Cassini, Ta Chen Peter Chang, Sirisak Chan-  
339 prasert, Hsiao-Tuan Chao, Gary D. Clark, Terra R. Coakley, Laurel A. Cobban, Joy D. Cogan,  
340 Matthew Coggins, F. Sessions Cole, Heather A. Colley, Cynthia M. Cooper, Heidi Cope, William  
341 J. Craigen, Andrew B. Crouse, Michael Cunningham, Precilla D'Souza, Hongzheng Dai, Surendra  
342 Dasari, Joie Davis, Jyoti G. Dayal, Matthew Deardorff, Esteban C. Dell'Angelica, Katrina  
343 Dipple, Daniel Doherty, Naghmeh Dorrani, Argenia L. Doss, Emilie D. Douine, Laura Duncan,  
344 Dawn Earl, David J. Eckstein, Lisa T. Emrick, Christine M. Eng, Cecilia Esteves, Marni Falk,  
345 Liliana Fernandez, Elizabeth L. Fieg, Paul G. Fisher, Brent L. Fogel, Irman Forghani, William  
346 A. Gahl, Ian Glass, Bernadette Gochuico, Rena A. Godfrey, Katie Golden-Grant, Madison P.  
347 Goldrich, Alana Grajewski, Irma Gutierrez, Don Hadley, Sihoun Hahn, Rizwan Hamid, Kelly  
348 Hassey, Nichole Hayes, Frances High, Anne Hing, Fuki M. Hisama, Ingrid A. Holm, Jason Hom,  
349 Martha Horike-Pyne, Alden Huang, Yong Huang, Wendy Introne, Rosario Isasi, Kosuke Izumi,  
350 Fariha Jamal, Gail P. Jarvik, Jeffrey Jarvik, Suman Jayadev, Orpa Jean-Marie, Vaidehi Jobanputra,  
351 Lefkothea Karaviti, Jennifer Kennedy, Shamika Ketkar, Dana Kiley, Gonench Kilich, Shilpa N.  
352 Kobren, Isaac S. Kohane, Jennefer N. Kohler, Deborah Krakow, Donna M. Krasnewich, Elijah  
353 Kravets, Susan Korrick, Mary Koziura, Seema R. Lalani, Byron Lam, Christina Lam, Grace L.  
354 LaMoure, Brendan C. Lanpher, Ian R. Lanza, Kimberly LeBlanc, Brendan H. Lee, Roy Levitt,  
355 Richard A. Lewis, Pengfei Liu, Xue Zhong Liu, Nicola Longo, Sandra K. Loo, Joseph Loscalzo,  
356 Richard L. Maas, Ellen F. Macnamara, Calum A. MacRae, Valerie V. Maduro, Rachel Mahoney,  
357 Bryan C. Mak, May Christine V. Malicdan, Laura A. Mamounas, Teri A. Manolio, Rong Mao,  
358 Kenneth Maravilla, Ronit Marom, Gabor Marth, Beth A. Martin, Martin G. Martin, Julian A.  
359 Martínez-Agosto, Shruti Marwaha, Jacob McCauley, Allyn McConkie-Rosell, Alexa T. McCray,  
360 Elisabeth McGee, Heather Mefford, J. Lawrence Merritt, Matthew Might, Ghayda Mirzaa, Eva  
361 Morava, Paolo M. Moretti, Mariko Nakano-Okuno, Stan F. Nelson, John H. Newman, Sarah K.

362 Nicholas, Deborah Nickerson, Shirley Nieves-Rodriguez, Donna Novacic, Devin Oglesbee, James  
363 P. Orengo, Laura Pace, Stephen Pak, J. Carl Pallais, Christina GS. Palmer, Jeanette C. Papp, Neil  
364 H. Parker, John A. Phillips III, Jennifer E. Posey, Lorraine Potocki, Barbara N. Pusey, Aaron Quin-  
365 lan, Wendy Raskind, Archana N. Raja, Deepak A. Rao, Anna Raper, Genecee Renteria, Chloe M.  
366 Reuter, Lynette Rives, Amy K. Robertson, Lance H. Rodan, Jill A. Rosenfeld, Natalie Rosen-  
367 wasser, Francis Rossignol, Maura Ruzhnikov, Ralph Sacco, Jacinda B. Sampson, Mario Saporta,  
368 Judy Schaechter, Timothy Schedl, Kelly Schoch, C. Ron Scott, Daryl A. Scott, Vandana Shashi,  
369 Jimann Shin, Edwin K. Silverman, Janet S. Sinsheimer, Kathy Sisco, Edward C. Smith, Kevin  
370 S. Smith, Emily Solem, Lilianna Solnica-Krezel, Ben Solomon, Rebecca C. Spillmann, Joan M.  
371 Stoler, Jennifer A. Sullivan, Kathleen Sullivan, Angela Sun, Shirley Sutton, David A. Sweetser,  
372 Virginia Sybert, Holly K. Tabor, Amelia L. M. Tan, Queenie K.-G. Tan, Mustafa Tekin, Fred  
373 Telischi, Willa Thorson, Cynthia J. Tifft, Camilo Toro, Alyssa A. Tran, Brianna M. Tucker, Tiina  
374 K. Urv, Adeline Vanderver, Matt Velinder, Dave Viskochil, Tiphonie P. Vogel, Colleen E. Wahl,  
375 Melissa Walker, Stephanie Wallace, Nicole M. Walley, Jennifer Wambach, Jijun Wan, Lee-kai  
376 Wang, Michael F. Wangler, Patricia A. Ward, Daniel Wegner, Monika Weisz-Hubshman, Mark  
377 Wener, Tara Wenger, Katherine Wesseling Perry, Monte Westerfield, Matthew T. Wheeler, Jordan  
378 Whitlock, Lynne A. Wolfe, Kim Worley, Changrui Xiao, Shinya Yamamoto, John Yang, Diane B.  
379 Zastrow, Zhe Zhang, Chunli Zhao, Stephan Zuchner

## 380 **Methods**

### 381 **1 Simulated Patient Initialization**

382 We simulate patients for each of the 2,134 diseases in Orphanet [19] ([orphandata.org](http://orphandata.org), accessed  
383 October 29, 2019) that do not correspond to a group of clinically heterogeneous disorders (i.e.,  
384 “Category” classification), have at least one associated phenotype, and have at least one causal  
385 gene. For Orphanet diseases that were missing either a causal gene or phenotypes (but not both),  
386 and were listed as being a ‘clinical subtype’, ‘etiological subtype’, or ‘histopathological subtype’  
387 of another Orphanet disease that did have a causal gene and/or phenotypes, we imported the causal  
388 gene and/or phenotypes from the parent disease. For each patient, the gene set is initialized with the  
389 known causal disease gene (mapped to its Ensembl identifier); the age is randomly sampled from  
390 the age ranges associated with the disease (e.g., “infant”); and positive and negative phenotype  
391 terms from the Human Phenotype Ontology [25] (HPO, version 2019) are added with probabilities  
392  $Pr(term|disease)$  and  $1-Pr(term|disease)$  respectively, where  $Pr(term|disease)$  is provided  
393 in Orphanet and corresponds to the observed prevalence of a specific phenotype term presenting in  
394 patients with the disease.

### 395 **2 Modeling Diagnostic Process Imprecision**

396 To mimic real-world patients’ partially observed phenotypes, we perform phenotype dropout where  
397 each positive and negative phenotype term is removed from the simulated patient with probabilities  
398  $Pr(\text{positive dropout})$  and  $Pr(\text{negative dropout})$ , respectively set to 0.7 and 0.2 in our implementa-  
399 tion. We also perform phenotype corruption to replace specific phenotype terms (e.g., “arachn-  
400 odactyly”) with their less precise parent terms (e.g., “long fingers”) in the HPO ontology. Positive  
401 and negative phenotypes annotated to each patient are corrupted with probabilities  $Pr(\text{positive cor-}$   
402  $\text{ruption})$  and  $Pr(\text{negative corruption})$ , each set to 0.15 in our implementation. Finally, to model  
403 unrelated symptoms and comorbidities that would be present in real-world patients, we introduce  
404 phenotype noise by sampling new HPO phenotype terms that were mapped from ICD-10 billing  
405 codes from a large medical insurance claims database using the Unified Medical Language System  
406 (UMLS) crosswalk [26]. Positive phenotype terms are sampled with probabilities proportional to  
407 their prevalence in corresponding age-stratified populations (i.e., infants are defined as 0-1 years,  
408 children are 2-11 years, adolescents are 12-18 years, adults are 19-64 years, and seniors are 65+  
409 years), and negative phenotype terms are sampled from the same corresponding age-stratified pop-

410 ulations at random.

### 411 **3 Distractor Gene Modules**

412 In order to mimic the typical diagnostic process where numerous potentially disease-causal genes  
413 must be manually reviewed by a clinical team, we generate a set of  $1 + N_G$  highly plausible, yet  
414 ultimately non-causal, genes for each patient, where  $N_G$  is drawn from a Poisson distribution pa-  
415 rameterized by  $\lambda$ . In our implementation, the tunable parameter  $\lambda$  is set to the mean number of  
416 candidate genes considered in real-world patients with undiagnosed genetic conditions (see Meth-  
417 ods “Preprocessing Real Patient Data” below). These  $N_G$  genes are generated from the following  
418 six distractor gene modules with probabilities 0.33, 0.42, 0.05, 0.09, 0.08, and 0.03 respectively,  
419 which we set in our implementation based on the approximate frequency of each distractor gene  
420 type in real-world patients with undiagnosed diseases; these parameters can be customized by the  
421 user. Each distractor gene module contributes one gene to the simulated patient’s candidate gene  
422 list, and three distractor gene modules simultaneously add phenotype terms related to the added  
423 gene.

424 **1. Phenotypically-similar disease genes.** First, we identify genes causing “distractor” Mendelian  
425 diseases in Orphanet that have overlapping phenotype terms with the patient’s true disease (Figure  
426 2b, dark green). We categorize the phenotype terms associated with the distractor disease as “ob-  
427 ligate”, “strong”, “weak”, or “excluded” if their prevalence in patients with that disease is 100%,  
428 80-99%, 1-29% or 0% respectively. We require that all distractor diseases have at least one obli-  
429 gate phenotype term and/or at least one excluded phenotype term, or that all phenotype terms that  
430 overlap with the true disease of interest are weak. We add the causal gene for the distractor disease  
431 to the simulated patient’s set of candidate genes and add phenotype terms that overlap between the  
432 distractor and true disease to the simulated patient’s positive phenotype set. To ensure that these  
433 genes are challenging distractors but definitively non-causal, we add some excluded phenotypes  
434 to the simulated patient’s set of positive phenotypes and some obligate phenotypes to the simu-  
435 lated patient’s set of negative phenotypes. For distractor diseases with no associated obligate or  
436 excluded phenotypes and only weak overlapping phenotypes with the true disease, we instead add  
437 some strong, non-overlapping phenotypes to the simulated patient’s negative phenotypes. At each  
438 of these steps,  $1 + N_P$  phenotype terms are added to the simulated patient’s positive or negative  
439 phenotype sets, where  $N_P$  is drawn from a Poisson distribution parameterized by  $\lambda$ . In our imple-

440 mentation, we set  $\lambda$  such that simulated patients and real-world patients with undiagnosed diseases  
441 have approximately the same number of annotated phenotype terms on average (see Figure 3 and  
442 Methods “Preprocessing Real Patient Data” below).

443 **2. Phenotypically-distinct disease genes.** Since any variants in known disease genes tend to be  
444 investigated during the diagnostic process, we also add genes causing Mendelian diseases that do  
445 not have any phenotypic overlap with the patient’s true disease (Figure 2b, yellow) [27].

446 **3. Insufficiently explanatory genes.** Genes that are not yet known to be disease-causing but are  
447 associated with a subset of the patient’s disease-relevant phenotypes are also strong candidates for  
448 further diagnostic investigation. To generate such insufficiently explanatory genes, we first curate  
449 a set of non-disease genes as the set of all genes from DisGeNET [28] (accessed April 16, 2019,  
450 [https://www.disgenet.org/downloads/all\\_gene\\_disease\\_associations.tsv](https://www.disgenet.org/downloads/all_gene_disease_associations.tsv)) and excluding any genes  
451 causally associated with a disease in Orphanet or in HPO Annotation [29, 30] (accessed February  
452 12, 2019, [http://compbio.charite.de/jenkins/job/hpo.annotations.monthly/ALL\\_SOURCES\\_ALL\\_FREQUENCIES\\_diseases\\_to\\_genes\\_to\\_phenotypes.txt](http://compbio.charite.de/jenkins/job/hpo.annotations.monthly/ALL_SOURCES_ALL_FREQUENCIES_diseases_to_genes_to_phenotypes.txt)). We add non-disease genes that are asso-  
454 ciated with a strict subset of low prevalence phenotypes from the simulated patient’s true disease  
455 (Figure 2b, light orange). We then add  $1 + N_P$  of the gene’s phenotype terms to the simulated  
456 patient’s positive phenotype set if none are already present, with  $N_P$  defined as above.

457 **4. Genes associated with incidental phenotypes.** Naturally occurring phenotypic variance present  
458 across healthy individuals can be incorrectly considered to be relevant to a patient’s disease during  
459 diagnostic evaluations. To include genes causing these nonsyndromic phenotypes, we add non-  
460 disease genes associated only with phenotypes that do not overlap with the simulated patient’s  
461 true disease (Figure 2b, purple). We add some of the gene’s phenotypes to the simulated patient’s  
462 positive phenotype set as before.

463 **5. Similarly expressed genes.** We also add genes with similar tissue expression as the patient’s  
464 causal disease gene (Figure 2b, dark orange), as a candidate gene’s expression in relevant tissues  
465 is considered as supporting experimental evidence for a gene-disease association in clinical eval-  
466 uations [31]. For each gene, we compute its average tissue expression in transcripts per million  
467 in each of 54 tissue types profiled in GTEx [32] (accessed October 29, 2019, [https://gtexportal.org/home/datasets/GTEx\\_Analysis\\_2017-06-05\\_v8\\_RNASeQCv1.1.9\\_gene\\_median\\_tpm.tsv](https://gtexportal.org/home/datasets/GTEx_Analysis_2017-06-05_v8_RNASeQCv1.1.9_gene_median_tpm.tsv)). For  
469 each tissue type, we linearly 0,1-normalize the per-gene expression values such that the gene with  
470 the lowest expression in that tissue type is assigned a value of 0 and the gene with the highest

471 expression in that tissue type is assigned a value of 1. We compare each gene’s normalized tissue  
472 expression vector to the simulated patient’s causal gene’s tissue expression vector using cosine sim-  
473 ilarity. We select one of the top 100 most similar genes with probability proportional to its tissue  
474 expression similarity, excluding known disease genes with phenotypic overlap with the simulated  
475 patient’s true disease.

476 **6. Common false positive genes.** Finally, we add genes from the FrequentLy mutAted GeneS  
477 (FLAGS) database [33] with probabilities proportional to the number of rare functional variants  
478 affecting these genes in general populations, as computational pipelines tend to frequently priori-  
479 tize these genes due to their length and variational excess.

## 480 **4 Preprocessing Real Patient Data**

481 We selected all patients from the Undiagnosed Diseases Network (UDN) with a molecular diagno-  
482 sis as of March 19, 2020. Each patient is annotated with a set of positive and negative HPO pheno-  
483 type terms and a set of strong candidate genes that were considered by clinical teams who handled  
484 each case. For each of the 362 diagnosed patients who received genomic sequencing through the  
485 UDN, we augment their candidate gene lists with disease-associated and other clinically-relevant  
486 genes listed on their clinical sequencing reports [27]. Where possible, patients’ gene lists were  
487 further augmented with genes prioritized by the Brigham Genomic Medicine pipeline [34]. We  
488 map all genes to Ensembl identifiers, discard prenatal phenotype terms related to the mother’s  
489 pregnancy, and exclude patients with fewer than five candidate genes. The final cohort includes  
490 248 patients.

491 The Undiagnosed Diseases Network study is approved by the National Institutes of Health in-  
492 stitutional review board (IRB), which serves as the central IRB for the study (Protocol 15HG0130).  
493 All patients accepted to the UDN provide written informed consent to share their data across the  
494 UDN as part of a network-wide informed consent process.

## 495 **5 Comparing Simulated Patients to Real Patients**

496 Of the 248 diagnosed UDN patients that we consider, only 121 patients were diagnosed with a  
497 disease in Orphanet that we were able to model (see Section 1 above). We construct a disease-  
498 matched cohort of 2,420 simulated patients by selecting, for each of these 121 UDN patients, 20  
499 simulated patients with the same disease. We first visualize positive phenotype term similarities  
500 between real and simulated patients using non-linear dimension reduction via a Uniform Manifold

501 Approximation and Projection (UMAP) plot [35]. We also compare each real patient to all sim-  
502 ulated patients in the disease-matched cohort by computing pairwise Jaccard similarities ranging  
503 from 0 to 1 inclusively between the positive phenotype terms annotated to each real patient and the  
504 positive phenotype terms annotated to each simulated patient. For each real patient, we then rank  
505 all simulated patients from highest to lowest Jaccard similarity and analyze those simulated pa-  
506 tients' corresponding diseases to assess whether simulated patients are as phenotypically specific  
507 to each disease as real patients are. Finally, we evaluate the average Jaccard similarity between the  
508 query real-world patient and the top 10 retrieved simulated patients with the same disease com-  
509 pared to the average Jaccard similarity between the query and the top 10 real-world patients with  
510 a different disease using a one-sided Wilcoxon signed-rank test implemented in the SciPy Stats  
511 library. We perform the Shapiro-Wilk test from the SciPy Stats library to test for normality.

## 512 **6 Evaluating Gene Prioritization Tools on Novel Diseases**

513 To model novel genetic conditions in our simulated patients, we leverage a knowledge-graph  
514 (KG) of gene–gene, gene–disease, gene–phenotype, and phenotype–disease annotations from Phe-  
515 nolyzer [11] that is time-stamped to February 2015 (obtained from [github.com/WGLab/phenolyzer/  
516 tree/eccc7410729276859b9023a00f20e75c2ce58862](https://github.com/WGLab/phenolyzer/tree/eccc7410729276859b9023a00f20e75c2ce58862)) and the HPO-A ontology [30] time stamped  
517 to January 2015 (obtained from [github.com/drseb/HPO-archive/tree/master/hpo.annotations.monthly/  
518 2015-01-28\\_14-15-03/archive/annotation](https://github.com/drseb/HPO-archive/tree/master/hpo.annotations.monthly/2015-01-28_14-15-03/archive/annotation) and [github.com/drseb/HPO-archive/tree/master/2014-2015/  
519 2015\\_week\\_4/annotations/artefacts](https://github.com/drseb/HPO-archive/tree/master/2014-2015/2015_week_4/annotations/artefacts)). Phenotype-phenotype annotations are from the 2019 HPO on-  
520 tology. All gene names are mapped to Ensembl IDs, and older phenotype terms are updated to the  
521 2019 HPO ontology. We also manually time-stamp each disease and disease–gene association in  
522 Orphanet according to the date of the Pubmed article that reported the discovery; discoveries af-  
523 ter February 2015 are considered novel with respect to our KG. Note that the KG time-stamped  
524 to February 2015 may not reflect all new information contained in the most recent publications  
525 from PubMed, as would be expected for any curated database. We categorize each novel discov-  
526 ery as in Figure 1b. We apply the same process to manually annotate the novelty of disease-gene  
527 associations in the real-world UDN cohort.

528 We reimplement four well-known gene prioritization tools using our 2015 time-stamped KG.  
529 We use publicly-available code from <https://bitbucket.org/bejerano/phrank> and [https://github.com/  
530 WGLab/phenolyzer](https://github.com/WGLab/phenolyzer) to run Phrank [10] and Phenolyzer [11] respectively. We reimplement Pheno-  
531 mizer [12] as described in their paper, as open-source code is not available. Although the original

532 implementation of Phenomizer randomly samples phenotype terms 100,000 times to generate p-  
533 values for each patient–disease similarity score, we use 10,000 random samplings instead, as this  
534 was substantially faster, and varying the number of samplings did not impact overall gene rankings.  
535 We define a patient–gene match score for Phenomizer as the highest patient–disease match score  
536 across all diseases caused by that gene. We report how well each of these tools—both versions of  
537 Phrank, Phenolyzer, and Phenomizer—ranked the causal gene for each simulated patient for each  
538 different category of novel disorders as outlined in Figure 1b.



## References

539

540

541

542

543

544

545

546

547

548

549

550

551

552

553

554

555

556

557

558

559

560

561

562

563

564

565

566

567

568

569

570

571

572

573

574

575

576

577

578

579

1. Nguengang Wakap, S. *et al.* Estimating cumulative point prevalence of rare diseases: analysis of the Orphanet database. *European Journal of Human Genetics* **28**, 165–173 (2020). Number: 2 Publisher: Nature Publishing Group.
2. Chong, J. X. *et al.* The Genetic Basis of Mendelian Phenotypes: Discoveries, Challenges, and Opportunities. *American Journal of Human Genetics* **97**, 199 (2015). Publisher: Elsevier.
3. Gahl, W. A. *et al.* The National Institutes of Health Undiagnosed Diseases Program: insights into rare diseases. *Genetics in Medicine: Official Journal of the American College of Medical Genetics* **14**, 51–59 (2012).
4. Splinter, K. *et al.* Effect of genetic diagnosis on patients with previously undiagnosed disease. *New England Journal of Medicine* **379**, 2131–2139 (2018).
5. Posey, J. E. *et al.* Insights into genetics, human biology and disease gleaned from family based genomic studies. *Genetics in Medicine* **21**, 798–812 (2019). Number: 4 Publisher: Nature Publishing Group.
6. Dymant, D. A. *et al.* Whole-exome sequencing broadens the phenotypic spectrum of rare pediatric epilepsy: a retrospective study. *Clinical Genetics* **88**, 34–40 (2015).
7. Gahl, W. A., Wise, A. L. & Ashley, E. A. The Undiagnosed Diseases Network of the National Institutes of Health: A National Extension. *JAMA* **314**, 1797–1798 (2015).
8. Ramoni, R. B. *et al.* The Undiagnosed Diseases Network: Accelerating Discovery about Health and Disease. *American Journal of Human Genetics* **100**, 185–192 (2017).
9. Kobren, S. N. *et al.* Commonalities across computational workflows for uncovering explanatory variants in undiagnosed cases. *Genetics in Medicine* **23**, 1075–1085 (2021). Bandiera\_abtest: a Cc\_license\_type: cc\_by Cg\_type: Nature Research Journals Number: 6 Primary\_atype: Research Publisher: Nature Publishing Group.
10. Jagadeesh, K. A. *et al.* Phrank measures phenotype sets similarity to greatly improve Mendelian diagnostic disease prioritization. *Genetics in Medicine* **21**, 464–470 (2019). Bandiera\_abtest: a Cg\_type: Nature Research Journals Number: 2 Primary\_atype: Research Publisher: Nature Publishing Group.
11. Yang, H., Robinson, P. N. & Wang, K. Phenolyzer: phenotype-based prioritization of candidate genes for human diseases. *Nature Methods* **12**, 841–843 (2015).
12. Köhler, S. *et al.* Clinical Diagnostics in Human Genetics with Semantic Similarity Searches in Ontologies. *American Journal of Human Genetics* **85**, 457–464 (2009).
13. Wright, C. F. *et al.* Genetic diagnosis of developmental disorders in the DDD study: a scalable analysis of genome-wide research data. *Lancet (London, England)* **385**, 1305–1314 (2015).
14. Smedley, D. & Robinson, P. N. Phenotype-driven strategies for exome prioritization of human Mendelian disease genes. *Genome Medicine* **7**, 81 (2015).
15. Li, Q., Zhao, K., Bustamante, C. D., Ma, X. & Wong, W. H. Xrare: a machine learning method jointly modeling phenotypes and genetic evidence for rare disease diagnosis. *Genetics in Medicine* **21**, 2126–2134 (2019). Bandiera\_abtest: a Cc\_license\_type: cc\_by Cg\_type: Nature Research Journals Number: 9 Primary\_atype: Research Publisher: Nature Publishing Group.

- 580 16. Boudellioua, I., Kulmanov, M., Schofield, P. N., Gkoutos, G. V. & Hoehndorf, R. DeepPVP:  
581 phenotype-based prioritization of causative variants using deep learning. *BMC Bioinformatics*  
582 **20**, 65 (2019).
- 583 17. Kumar, A. A. *et al.* pBRIT: gene prioritization by correlating functional and phenotypic an-  
584 notations through integrative data fusion. *Bioinformatics* **34**, 2254–2262 (2018).
- 585 18. Tranchevent, L.-C. *et al.* Candidate gene prioritization with Endeavour. *Nucleic Acids Re-*  
586 *search* **44**, W117–W121 (2016).
- 587 19. Maiella, S., Rath, A., Angin, C., Mousson, F. & Kremp, O. Orphanet and its consortium:  
588 where to find expert-validated information on rare diseases. *Revue Neurologique* **169** (2013).
- 589 20. Smedley, D. *et al.* Next-generation diagnostics and disease-gene discovery with the Exomiser.  
590 *Nature Protocols* **10**, 2004–2015 (2015). Number: 12 Publisher: Nature Publishing Group.
- 591 21. Birgmeier, J. *et al.* AMELIE speeds Mendelian diagnosis by matching patient phenotype and  
592 genotype to primary literature. *Science Translational Medicine* **12**, eaau9113 (2020).
- 593 22. O’Brien, T. D. *et al.* Artificial intelligence (AI)-assisted exome reanalysis greatly aids in the  
594 identification of new positive cases and reduces analysis time in a clinical diagnostic labora-  
595 tory. *Genetics in Medicine* **24**, 192–200 (2022).
- 596 23. Chen, R. J., Lu, M. Y., Chen, T. Y., Williamson, D. F. K. & Mahmood, F. Synthetic data in  
597 machine learning for medicine and healthcare. *Nature Biomedical Engineering* **5**, 493–497  
598 (2021). Number: 6 Publisher: Nature Publishing Group.
- 599 24. Rehm, H. L. Time to make rare disease diagnosis accessible to all. *Nature Medicine* **28**,  
600 241–242 (2022). Number: 2 Publisher: Nature Publishing Group.
- 601 25. Köhler, S. *et al.* Expansion of the Human Phenotype Ontology (HPO) knowledge base and  
602 resources. *Nucleic Acids Research* **47**, D1018–D1027 (2019).
- 603 26. Bodenreider, O. The Unified Medical Language System (UMLS): integrating biomedical  
604 terminology. *Nucleic Acids Research* **32**, D267–270 (2004).
- 605 27. Richards, S. *et al.* Standards and Guidelines for the Interpretation of Sequence Variants:  
606 A Joint Consensus Recommendation of the American College of Medical Genetics and Ge-  
607 nomics and the Association for Molecular Pathology. *Genetics in medicine : official journal*  
608 *of the American College of Medical Genetics* **17**, 405–424 (2015).
- 609 28. Piñero, J. *et al.* DisGeNET: a comprehensive platform integrating information on human  
610 disease-associated genes and variants. *Nucleic Acids Research* **45**, D833–D839 (2017). Pub-  
611 lisher: Oxford Academic.
- 612 29. Maiella, S., Rath, A., Angin, C., Mousson, F. & Kremp, O. [Orphanet and its consortium:  
613 where to find expert-validated information on rare diseases]. *Revue Neurologique* **169 Suppl**  
614 **1**, S3–8 (2013).
- 615 30. Robinson, P. N. *et al.* The Human Phenotype Ontology: A Tool for Annotating and Analyzing  
616 Human Hereditary Disease. *American Journal of Human Genetics* **83**, 610–615 (2008).
- 617 31. Strande, N. T. *et al.* Evaluating the Clinical Validity of Gene-Disease Associations: An  
618 Evidence-Based Framework Developed by the Clinical Genome Resource. *American Jour-*  
619 *nal of Human Genetics* **100**, 895–906 (2017).

- 620 32. The Genotype-Tissue Expression (GTEx) project. *Nature genetics* **45**, 580–585 (2013).
- 621 33. Shyr, C. *et al.* FLAGS, frequently mutated genes in public exomes. *BMC Medical Genomics*  
622 **7**, 64 (2014).
- 623 34. Haghghi, A. *et al.* An integrated clinical program and crowdsourcing strategy for genomic  
624 sequencing and Mendelian disease gene discovery. *npj Genomic Medicine* **3**, 1–10 (2018).  
625 Number: 1 Publisher: Nature Publishing Group.
- 626 35. McInnes, L., Healy, J. & Melville, J. UMAP: Uniform Manifold Approximation  
627 and Projection for Dimension Reduction. Tech. Rep. arXiv:1802.03426, arXiv (2020).  
628 ArXiv:1802.03426 [cs, stat] type: article.
